# Supplementary material
Source: PubMed Central journal article supplement (PMC4380164)
Supplement: NIHMS668122-supplement-1.pdf [file NIHMS668122-supplement-1.pdf]

## **SUPPLEMENTAL MATERIAL**

### **Relations Between Aortic Stiffness and Left Ventricular Structure and Function in Older Participants in the Age, Gene/Environment Susceptibility—Reykjavik Study**

## Supplemental Methods

The oblique coronal scan of the aortic root was obtained with a 3.2 ms repetition time, 1.4 ms echo time, and 8 mm slice thickness with 30 phases per cardiac cycle. The imaging matrix was 224x224 with a reconstruction matrix of 256x256 and a 1.41 mm average pixel size.

The first cross-sectional aortic scan was taken using FIESTA sequences with a 4.3 ms repetition time, 1.9 ms echo time, and 6 mm slice thickness with 30 phases per cardiac cycle. Early in the study, images were obtained using 256x256 imaging and reconstruction matrices in all participants. The imaging matrix was later adjusted to 352x352 (reconstruction matrix 512x512) for all participants who were able to hold their breath long enough to obtain the higher resolution sequence. Average pixel size was 0.66 mm for the 512x512 images and 1.33 mm for the 256x256 images. The second cross-sectional aortic acquisition was obtained as a single 6 mm slice, using an ECG-triggered double inversion recovery fast spin echo sequence with 52 ms echo time, gated at end-diastole with one acquisition at every other heartbeat to prevent slow-flow artifacts. The imaging matrix was 256x192 with a reconstructed matrix of 512x512 and a 1.41 mm average pixel size.

The cardiac 4-chamber and 2-chamber scans were obtained using FIESTA sequences with a repetition time of 3.2 ms for the 4-chamber and 3.1 ms for the 2-chamber, echo time of 1.4 ms for the 4-chamber and 1.3 ms for the 2-chamber, and 8 mm slice thickness with 30 phases per cardiac cycle. The imaging matrix was 224x224 with a reconstructed matrix of 256x256 and a 1.41 mm average pixel size.

**Supplemental Table. Included vs. Excluded Participants**

| Variables                          | Included  | Excluded  | P     |
|------------------------------------|-----------|-----------|-------|
| Sample size                        | 347       | 255       |       |
| Women, n (%)                       | 189 (55)  | 150 (59)  | 0.3   |
| Age range, years                   | 72 to 91  | 72 to 97  | 0.1   |
| Height, cm                         | 169 ± 9   | 168 ± 10  | 0.3   |
| Weight, kg                         | 77 ± 14   | 77 ± 15   | 0.9   |
| Body surface area, m <sup>2</sup>  | 1.9 ± 0.2 | 1.9 ± 0.2 | 0.8   |
| Body mass index, kg/m <sup>2</sup> | 27 ± 4    | 27 ± 4    | 0.4   |
| Heart rate, min <sup>-1</sup>      | 63 ± 9    | 65 ± 11   | 0.003 |
| Brachial pressure, mm Hg           |           |           |       |
| Systolic                           | 141 ± 19  | 143 ± 20  | 0.3   |
| Diastolic                          | 64 ± 9    | 66 ± 11   | 0.046 |
| Mean                               | 94 ± 11   | 96 ± 13   | 0.1   |
| Pulse pressure                     | 77 ± 18   | 77 ± 19   | 0.6   |
| Carotid pressure, mm Hg            |           |           |       |
| Peak                               | 142 ± 24  | 143 ± 27  | 0.5   |
| End-systolic                       | 105 ± 15  | 108 ± 18  | 0.1   |
| Augmentation index                 | 8 ± 14    | 10 ± 15   | 0.1   |
| Fasting glucose, mmol/L            | 5.6 ± 0.9 | 5.6 ± 0.9 | 0.8   |
| Total cholesterol, mmol/L          | 5.3 ± 1.1 | 5.3 ± 1.2 | 1.0   |
| HDL cholesterol, mmol/L            | 1.6 ± 0.4 | 1.6 ± 0.4 | 0.6   |
| Triglycerides, mmol/L              | 1.2 ± 0.5 | 1.2 ± 0.5 | 0.6   |
| Medical history, n (%)             |           |           |       |
| Diabetes                           | 36 (10)   | 24 (9)    | 0.8   |
| Treated hypertension               | 243 (70)  | 199 (78)  | 0.032 |
| Statin use                         | 137 (40)  | 101 (40)  | 1.0   |
| Cardiovascular disease             | 72 (21)   | 83 (33)   | 0.002 |
| Current smoker                     | 24 (7)    | 20 (8)    | 0.8   |

Included versus excluded participant comparisons were performed using an independent-samples t-test for continuous variables and a cross-tab for dichotomous medical history variables. HDL, high density lipoprotein
